# Supplementary material for: Protein-Coding Region Derived Small RNA in Exosomes from Influenza A Virus–Infected Cells
Source: MDPI journal article supplement (doi:10.3390/ijms24010867), 2023-01-03
Supplement: s1 [file s1]

Table S2. Number of reads mapped to protein coding regions of influenza virus A/equi/Kentucky/81 reference genome (CY028828.1 - CY028835.1)

| Segment | Gene | Strand | Length | mock 1 | mock 2 | flu 1 | flu 2  |
|---------|------|--------|--------|--------|--------|-------|--------|
| I       | PB-2 | +      | 2280   | 5      | 106    | 15906 | 35980  |
| II      | PB-1 | +      | 2274   | 36     | 778    | 67751 | 108237 |
| III     | PA   | +      | 2151   | 7      | 63     | 16066 | 25182  |
| IV      | HA   | +      | 1701   | 5      | 62     | 45826 | 59073  |
| V       | NP   | +      | 1497   | 10     | 99     | 33313 | 47703  |
| VI      | NA   | +      | 1410   | 0      | 23     | 88915 | 115197 |
| VII     | M    | +      | 982    | 0      | 31     | 7852  | 13589  |
| VIII    | NS   | +      | 838    | 0      | 3      | 1498  | 3632   |
